# Supplementary material
Source: publisher figshare collection journal article supplement (https://gsajournals.figshare.com/ndownloader/files/24974861)
Supplement: Supplementary file 1 [file 24974861]

## Sheet: Sheet1
Table S6. Cell culture media cost per liter as of September 2020
	M3 + BPYE + 10% FCS	Amount		Cost ($)
		900 ml	Sigma M3	42.6
		3 g	BP + YE	1
		100 ml	FCS (Hyclone SH3007003)	270
	Total			313.6
	M3 + 2.5% FEx	Amount		Cost ($)
		975 ml	Sigma M3	42.6
		25 ml	FEx (DGRC)	137.5
	Total			180.1
	M3 + 2.5% FEx	Amount		Cost ($)
		975 ml	Sigma M3	42.6
		25 ml	FEx (DIY)	0
	Total			42.6
